# Supplementary material for: Cobalt lactate complex as a hole cocatalyst for significantly enhanced photocatalytic H2 production activity over CdS nanorods
Source: Royal Society of Chemistry journal article supplement (doi:10.1039/c8cy00067k), 2018-01-01
Supplement: c8cy00067k1.pdf [file c8cy00067k1.pdf]

## Supporting Information

### **Cobalt Lactate Complex as Hole Cocatalyst for Significantly Enhanced Photocatalytic H<sub>2</sub>-Production Activity over CdS Nanorods**

Lu Wang, Nan Xu, Xiaoyang Pan, Yishan He, Xuxu Wang and Wenyue Su\*

*State Key Laboratory of Photocatalysis on Energy and Environment,*

*Fuzhou University, Fuzhou, 350116, P. R. China*

*Corresponding author Tel & Fax: (+86)0591-22865820.*

*E-mail: [suweny@fzu.edu.cn](mailto:suweny@fzu.edu.cn)*

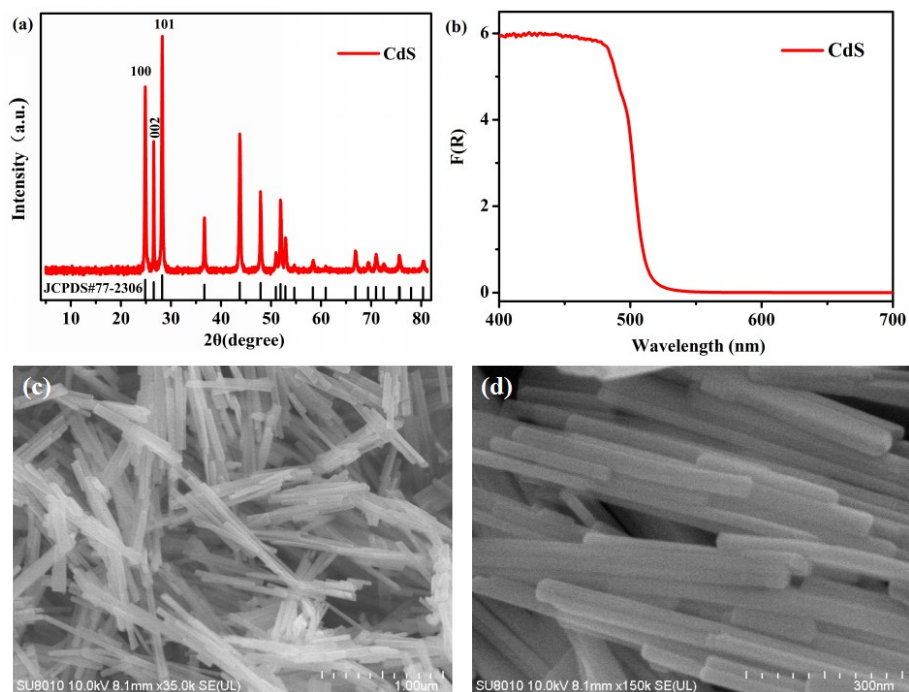

Fig. S1 XRD pattern (a), UV-Vis absorption spectrum (b) and SEM images (c and d) of CdS sample.

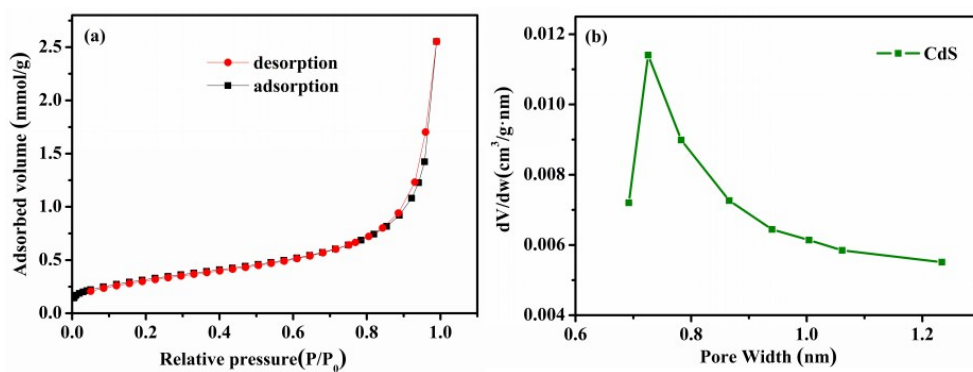

Fig. S2 N<sub>2</sub> adsorption - desorption isotherm (a) and the pore size distribution (HK) curve (b) of CdS sample.

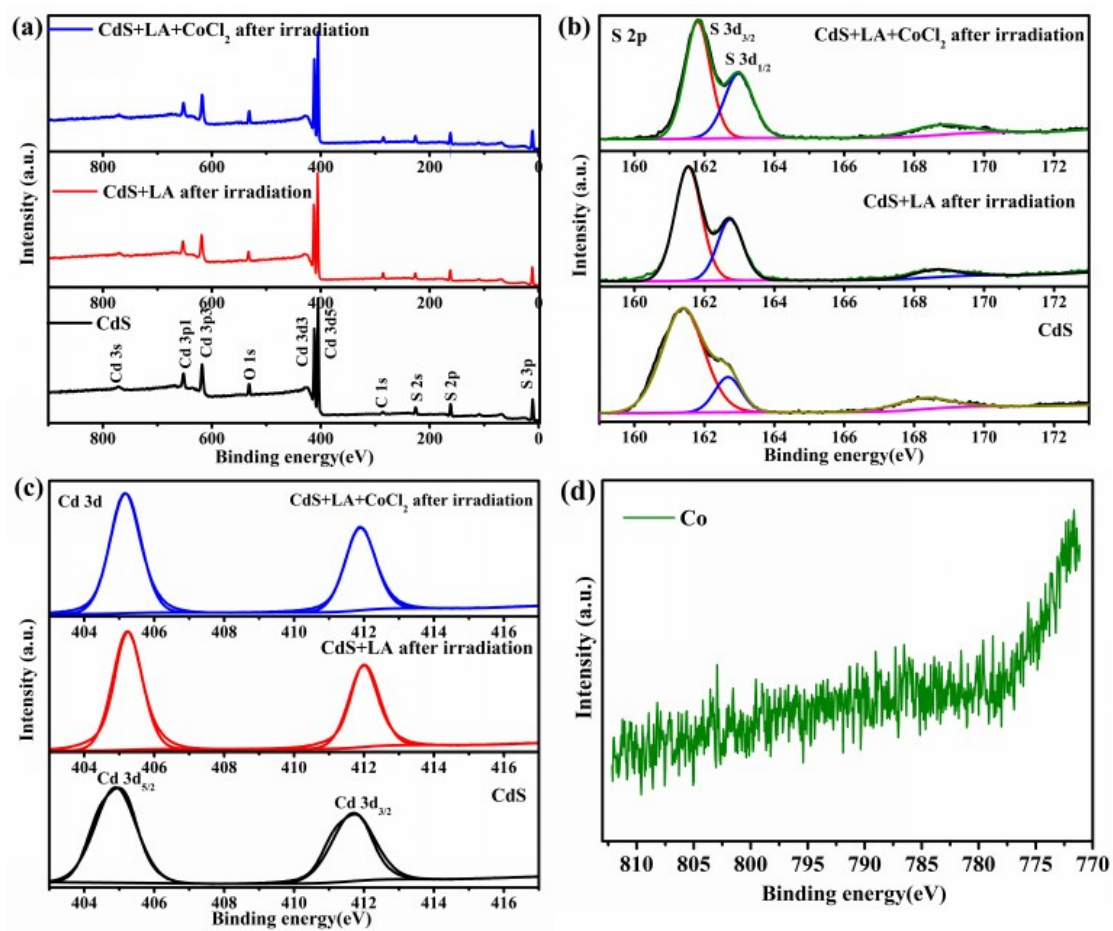

Fig. S3 XPS spectra of the CdS and CdS in the presence/absence of  $\text{CoCl}_2$  after irradiation.

(a) survey spectrum, (b) S 2p, (c) Cd 3d, (d) Co.

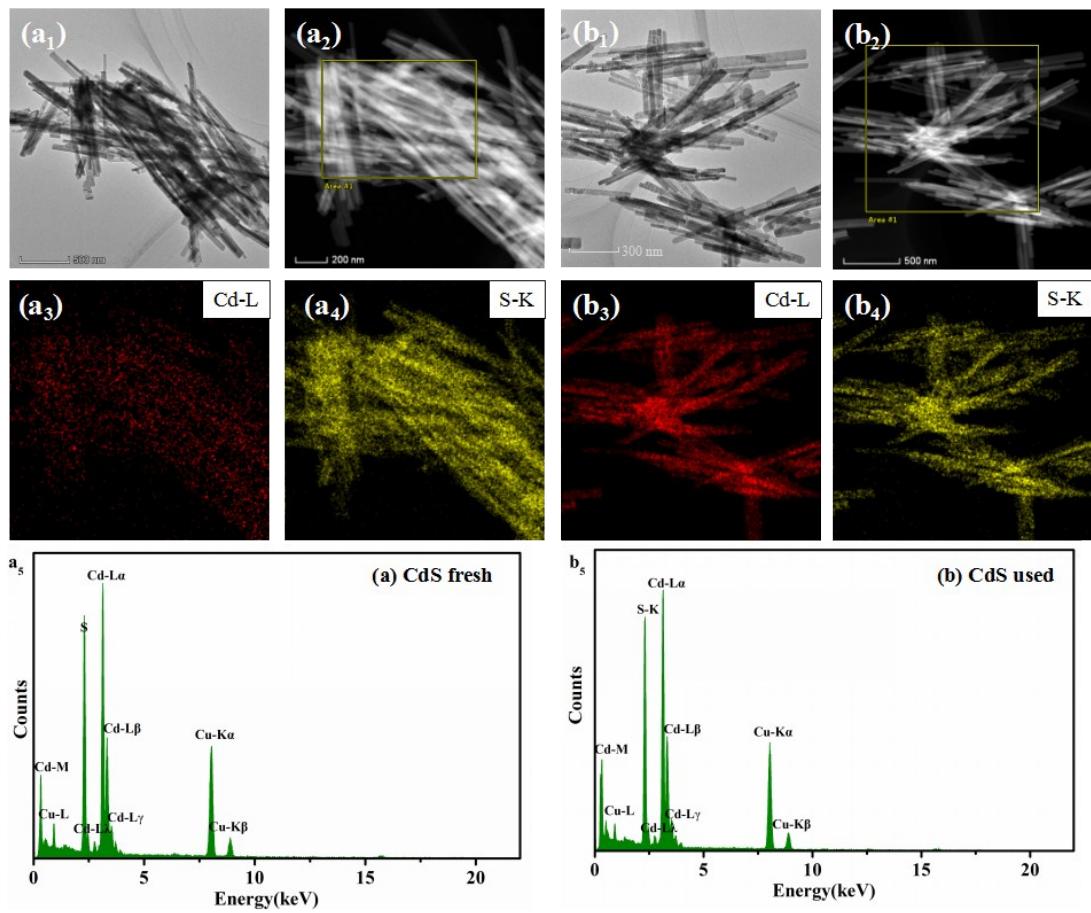

Fig. S4 TEM images, EDX-mappings and EDS spectra of the fresh (a<sub>1</sub> - a<sub>5</sub>) and the used (b<sub>1</sub> - b<sub>5</sub>) CdS samples.

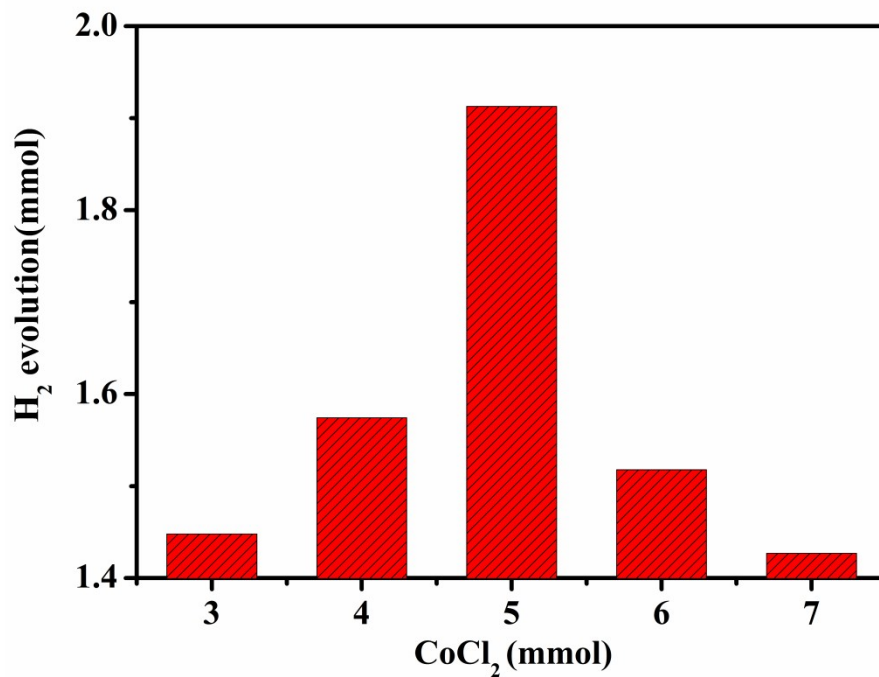

Fig. S5 The effect of the amount of CoCl<sub>2</sub> on the yield of H<sub>2</sub> in the photoreduction system.

Table S1 The H<sub>2</sub> production performance under different reaction conditions.

| dispersions                   | H <sub>2</sub> evolution (mmol) |      |      |
|-------------------------------|---------------------------------|------|------|
|                               | 1h                              | 2h   | 3h   |
| CdS+LA+CoCl <sub>2</sub>      | 0.61                            | 1.85 | 2.34 |
| CdS+LA                        | 0.07                            | 0.25 | 0.41 |
| CdS                           | -                               | -    | -    |
| LA+CoCl <sub>2</sub> solution | -                               | -    | -    |
| LA solution                   | -                               | -    | -    |
| CoCl <sub>2</sub> solution    | -                               | -    | -    |
| No visible light              | -                               | -    | -    |

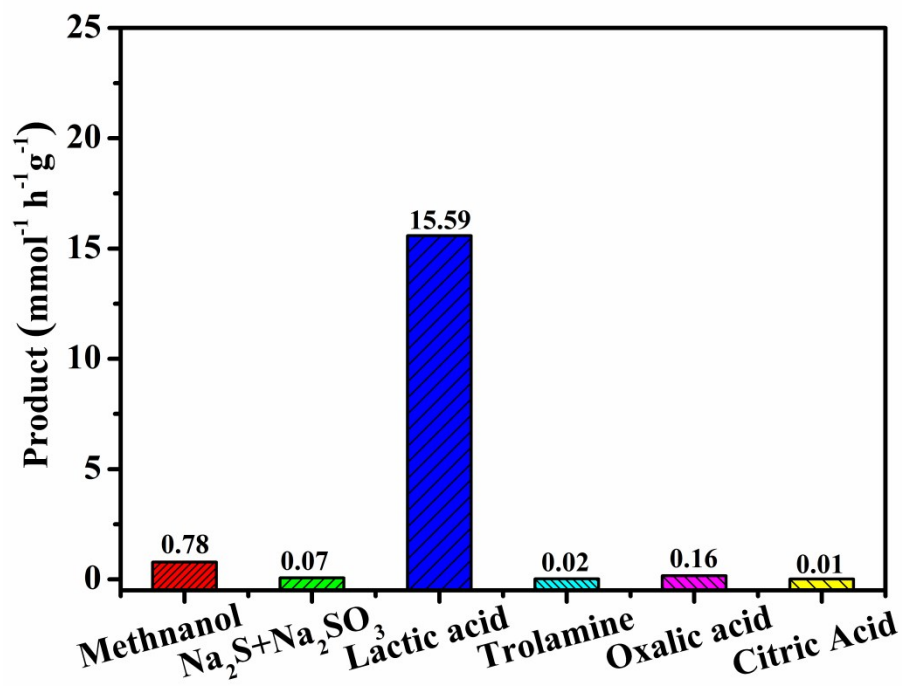

Fig. S6 The effects of sacrificial agents on the hydrogen production rate over CdS in  $\text{CoCl}_2$  solution.

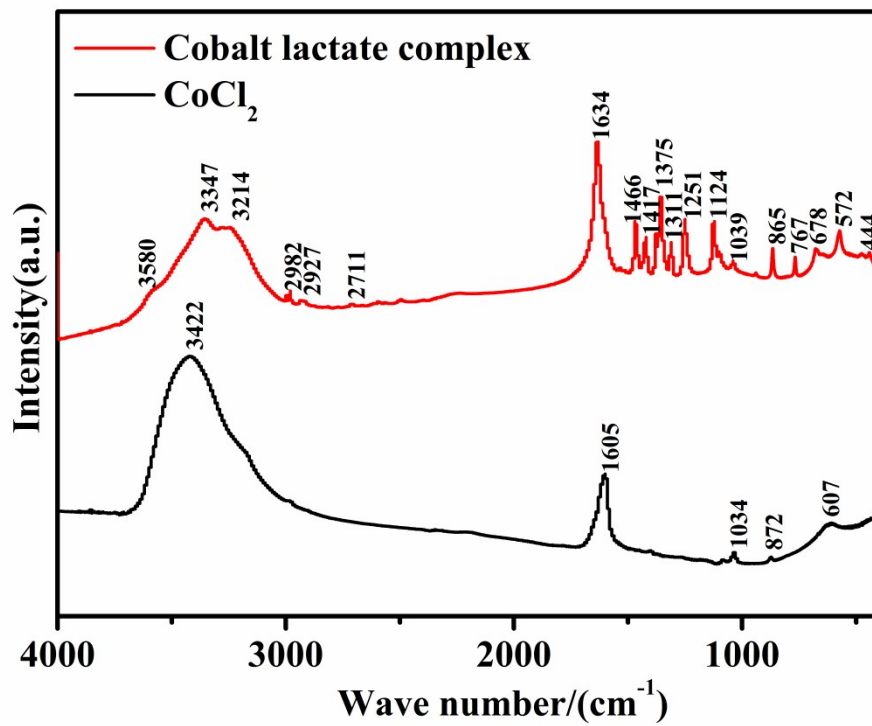

Fig. S7 The FT-IR spectra of cobalt lactate complex and  $\text{CoCl}_2$ .

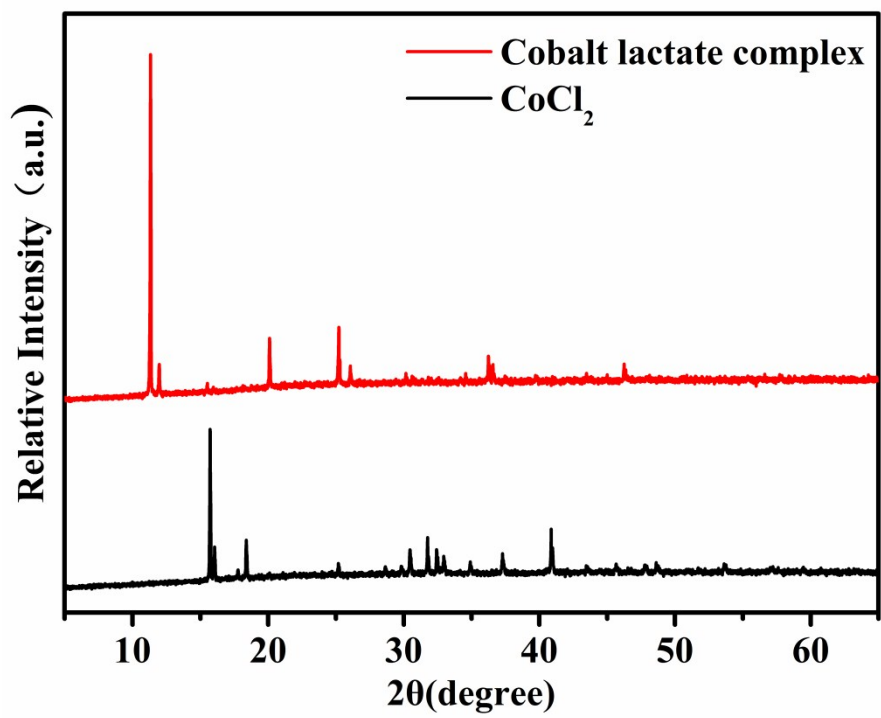

Fig. S8 The XRD patterns of cobalt lactate complex and CoCl<sub>2</sub>.



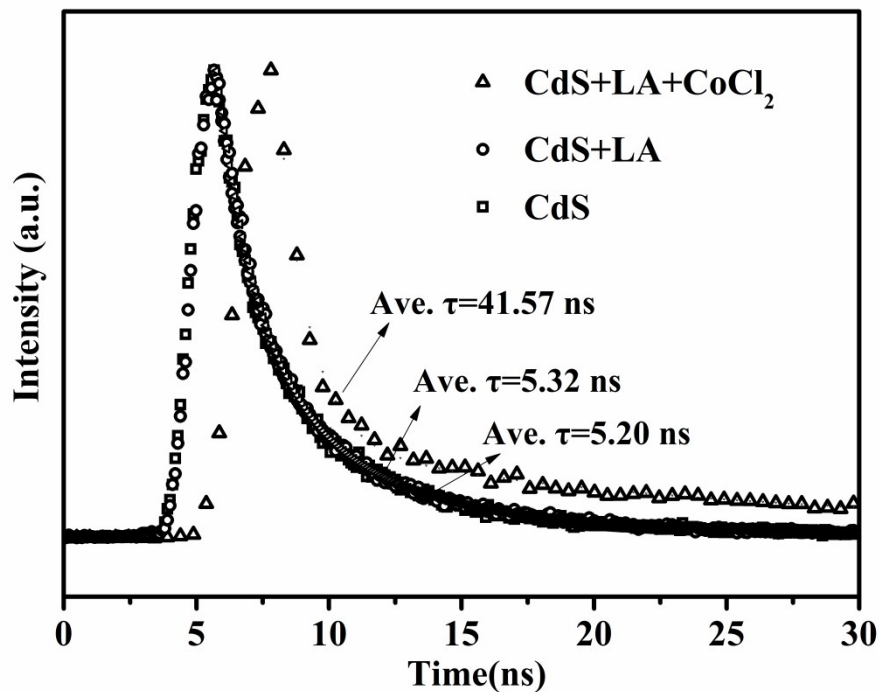

Fig. S9 The time-resolved PL spectra under 375 nm excitation.

Table S2 The data of time-resolved fluorescence.

| Sample                       | $\tau_1$ (ns) |       | $\tau_2$ (ns) |       | $\tau_3$ (ns) |       | Ave. $\tau$ (ns) |
|------------------------------|---------------|-------|---------------|-------|---------------|-------|------------------|
|                              | Value/ns      | Rel%  | Value/ns      | Rel%  | Value/ns      | Rel%  |                  |
| CdS+LA+<br>CoCl <sub>2</sub> | 1.137         | 15.86 | 13.2          | 32.73 | 72.12         | 51.41 | 41.57            |
| CdS+LA                       | 1.435         | 25.51 | 4.143         | 52.67 | 12.71         | 21.83 | 5.32             |
| CdS                          | 1.145         | 17.06 | 3.62          | 58.75 | 11.92         | 24.19 | 5.20             |

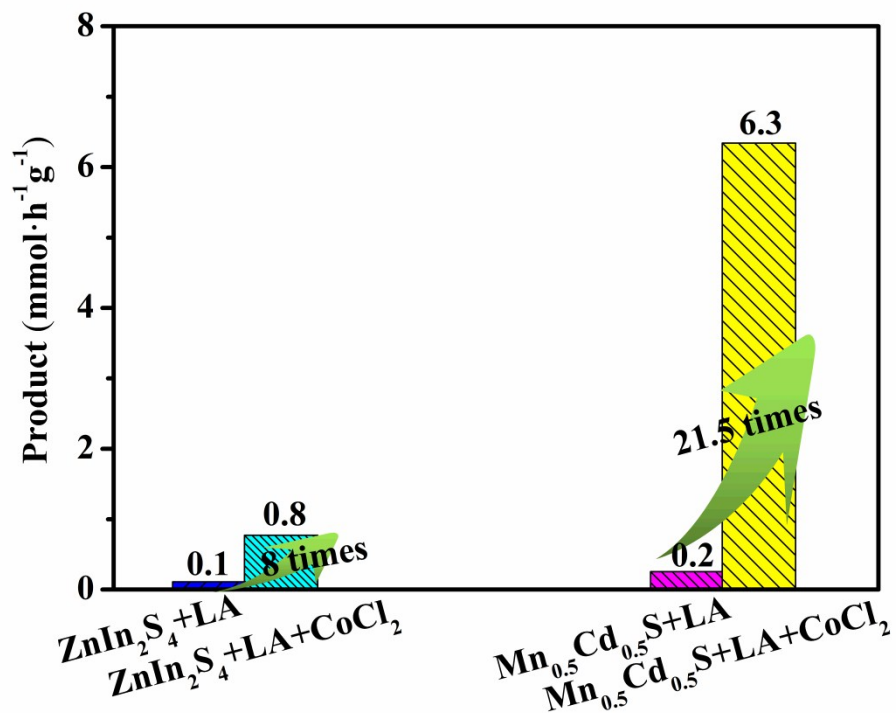

Fig. S10 The effects of cobalt lactate complex on the photocatalytic property of various catalysts.

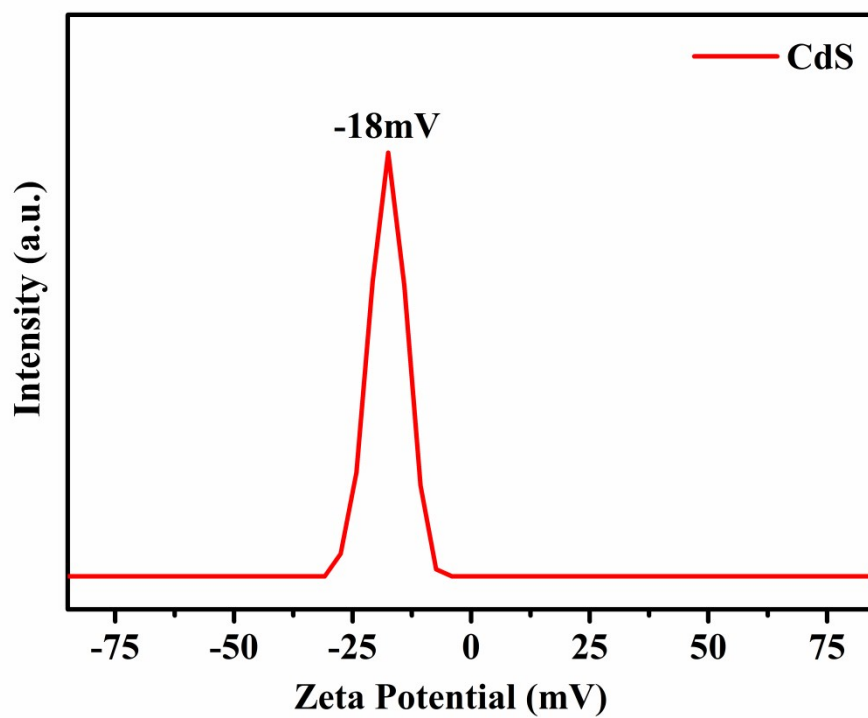

Fig. S11 Zeta potential ( $\xi$ ) of CdS aqueous dispersion.

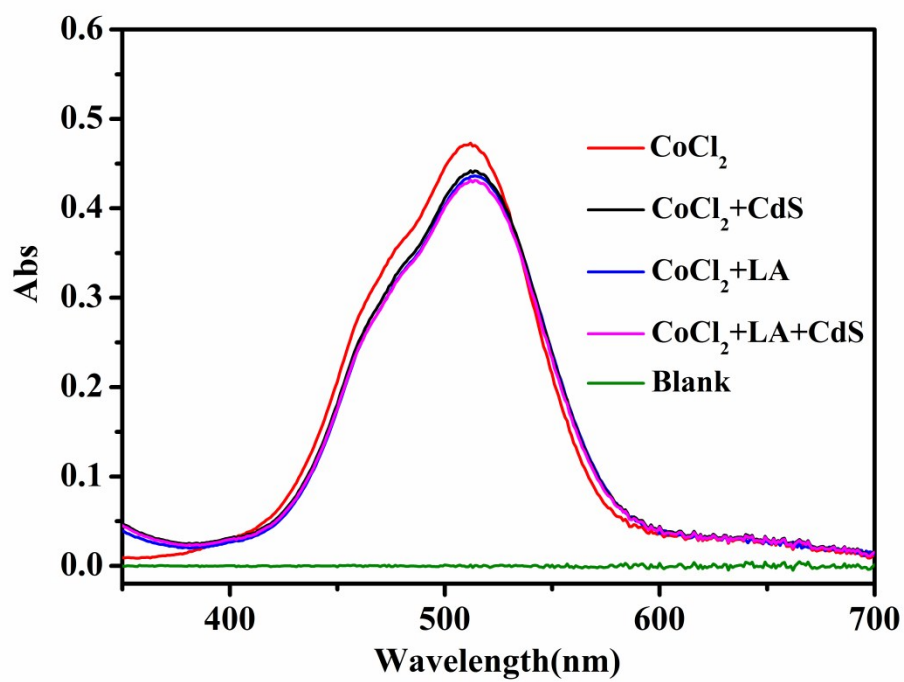

Fig. S12 The UV-vis absorption spectra of CoCl<sub>2</sub> solution before and after adding LA and CdS in the darkness.
